# Supplementary material for: Aqueous media ultra-sensitive detection of antibiotics via highly stable luminescent 3D Cadmium-based MOF
Source: Royal Society of Chemistry journal article supplement (doi:10.1039/d1nj04413c), 2021-01-01
Supplement: d1nj04413c1.pdf [file d1nj04413c1.pdf]

## Supporting Information

### **Aqueous media ultra-sensitive detection of antibiotics via highly stable luminescent 3D Cadmium-based MOF**

Muhammad Asad<sup>a</sup>, Shan Wang<sup>a\*</sup>, Qian-You Wang<sup>a</sup>, Lin-Ke Li<sup>a\*</sup>, Muhammad Imran Anwar<sup>b</sup>, Ayesha Younas<sup>c</sup>, Shuang-Quan Zang<sup>a</sup>

*<sup>a</sup>Henan Key Laboratory of Crystalline Molecular Functional Materials, Henan International Joint Laboratory of Tumor Theranostical Cluster Materials, Green Catalysis Center, and College of Chemistry, Zhengzhou University, Zhengzhou 450001, P. R. China*

*<sup>b</sup>Green Catalysis Center and College of Chemistry, Zhengzhou University, 450001 Zhengzhou, Henan, PR China*

*<sup>c</sup>Department of Pharmaceutics, School of Pharmaceutical Sciences, Zhengzhou University, Zhengzhou 450001, Henan, P.R. China*

## Table of contents

| Section | Detail                                                                                 | Page.no |
|---------|----------------------------------------------------------------------------------------|---------|
| i       | Experimental: Materials and methods                                                    | S3      |
| ii      | Crystallographic data collection and structural refinement                             | S3      |
| iii     | Crystal data for Compound <b>1</b> (Table. S1)                                         | S4      |
| iv      | Selected Bond Lengths and Bond Angles (Table. S2) (Table.S3)                           | S5      |
| v       | Thermal stability test for <b>1</b> (TGA) (Fig. S1)                                    | S6      |
| vi      | SEM and Mapping (Fig. S2)                                                              | S6      |
| vii     | Quenching and LoD calculations for antibiotics (Figs. S3-S10)                          | S7-S15  |
| viii    | Calculated $K_{sv}$ & $K_q$ and LoD values for common selected antibiotics (Table. S4) | S16     |
| ix      | Recyclability study (Fig. S11)                                                         | S16     |
| x       | Uv-visible spectroscopy (Fig. S12)                                                     | S17     |
| xi      | TCSPC calculation for <b>1</b> and different antibiotics (Fig. S13) (Table. S5)        | S18     |
| xii     | DFT calculations HOMO-LUMO (Fig. S14) (Table. S6)                                      | S19     |
| xiii    | References                                                                             | S20     |

## **i. Materials and methods**

All the chemical reagents and solvents were purchased of analytical grade from certified sellers and used without any further refinement. X-ray diffraction (PXRD) patterns were obtained with monochromatized Cu K $\alpha$  ( $\lambda = 1.540598 \text{ \AA}$ ) on a Rigaku D/Max-2500PC diffractometer at ambient temperature. FT-IR spectra were recorded with wavelength range 4000-400  $\text{cm}^{-1}$  using BRUKER ALPHA II spectrophotometer. TGA analysis was conducted via TA Q50 thermal analyzer with range of 30–800  $^{\circ}\text{C}$  at the rate of 10  $^{\circ}\text{C min}^{-1}$  under ambient environment. Scanning electron microscopic (SEM) study was investigated with Zeiss Sigma 500 microscope. UV-visible spectroscopy was performed via Hitachi UH4150 spectrophotometer. DFT calculations were carried out using Gaussian 09w package with B3LYP function and 6-31+G\* basis set. Elemental analyses (EA) were carried out with a Perkin-Elmer 240 elemental analyzer. Photoluminescence emission and excitation spectra were recorded at ambient temperature with a HORIBA FluoroLog-3 fluorescence spectrometer, while time-resolved decay measurements were carried on HORIBA FluoroLog-3 fluorescence spectrometer equipped with a laser of 370 nm working in time-correlated single-photon counting mode (TCSPC) with a time resolution of 100 ns.

## **ii. Crystallographic data collection and structural refinement**

Single crystal X-ray diffraction (SC-XRD) measurement for Cd-based MOF (**1**) was performed at 200 K on a Rigaku XtaLAB Pro diffractometer with Cu-K $\alpha$  radiation ( $\lambda = 1.54184 \text{ \AA}$ ). All the structures were solved with direct methods (SHELXS)<sup>1</sup> and refined by full-matrix least-squares on  $F^2$  using OLEX2,<sup>2</sup> which utilizes the SHELXL-2015 module<sup>3</sup>. The imposed restraints and constraints (ISOR, DFIX, DELU, TRIA, etc.) in the least-squares refinement of each structure were commented in the corresponding crystallographic CIF files. The crystal structures are visualized by DIAMOND3.2. Detailed information about the X-ray crystallography data, intensity collection procedure, and refinement results for the compound are summarized in Table S1.

### iii. Table S1 Crystal data for Compound 1

---

|                                             |                                                                                |
|---------------------------------------------|--------------------------------------------------------------------------------|
| Empirical formula                           | C <sub>93</sub> H <sub>77</sub> Cd <sub>2</sub> N <sub>7</sub> O <sub>11</sub> |
| Formula weight                              | 846.71                                                                         |
| Temperature/K                               | 200.00(10)                                                                     |
| Crystal system                              | Monoclinic                                                                     |
| Space group                                 | P2/c                                                                           |
| a/Å                                         | 14.4126(2)                                                                     |
| b/Å                                         | 20.6834(4)                                                                     |
| c/Å                                         | 16.4770(3)                                                                     |
| α/°                                         | 90                                                                             |
| β/°                                         | 104.140(2)                                                                     |
| γ/°                                         | 90                                                                             |
| Volume/Å <sup>3</sup>                       | 4763.00(15)                                                                    |
| Z                                           | 2                                                                              |
| ρ <sub>calc</sub> /g/cm <sup>3</sup>        | 1.181                                                                          |
| μ/mm <sup>-1</sup>                          | 4.030                                                                          |
| F(000)                                      | 1736.0                                                                         |
| Crystal size/mm <sup>3</sup>                | 0.03 × 0.03 × 0.02                                                             |
| Radiation                                   | CuKα (λ = 1.54184)                                                             |
| 2θ range for data collection/°              | 6.324 to 145.55                                                                |
| Index ranges                                | -17 ≤ h ≤ 17, -24 ≤ k ≤ 23, -20 ≤ l ≤ 18                                       |
| Reflections collected                       | 31299                                                                          |
| Independent reflections                     | 9196 [R <sub>int</sub> = 0.0516, R <sub>sigma</sub> = 0.0572]                  |
| Data/restraints/parameters                  | 9196/95/536                                                                    |
| Goodness-of-fit on F <sup>2</sup>           | 1.050                                                                          |
| Final R indexes [I >= 2σ (I)]               | R <sub>1</sub> = 0.0574, wR <sub>2</sub> = 0.1523                              |
| Final R indexes [all data]                  | R <sub>1</sub> = 0.0798, wR <sub>2</sub> = 0.1626                              |
| Largest diff. peak/hole / e Å <sup>-3</sup> | 1.13/-1.07                                                                     |

---

iv. Table S2. Selected Bond lengths for 1

| Atom | Atom             | Length/Å |
|------|------------------|----------|
| Cd1  | N1 <sup>3</sup>  | 2.300(5) |
| Cd1  | N2               | 2.312(5) |
| Cd1  | O1               | 2.451(3) |
| Cd1  | O1 <sup>4</sup>  | 2.399(3) |
| Cd1  | O2               | 2.373(4) |
| Cd1  | O3               | 2.493(3) |
| Cd1  | O4               | 2.302(4) |
| N1   | Cd1 <sup>5</sup> | 2.300(5) |
| O1   | Cd1 <sup>4</sup> | 2.399(3) |

<sup>1</sup>2-X,+Y,3/2-Z; <sup>2</sup>-X,+Y,1/2-Z; <sup>3</sup>+X,1+Y,+Z; <sup>4</sup>1-X,+Y,1/2-Z; <sup>5</sup>+X,-1+Y,+Z

Table S3. Selected Bond angles for 1

| Atom             | Atom | Atom            | Angle/°    |
|------------------|------|-----------------|------------|
| N1 <sup>3</sup>  | Cd1  | O1              | 93.03(14)  |
| N1 <sup>3</sup>  | Cd1  | O3              | 86.78(14)  |
| N2               | Cd1  | O1              | 86.38(15)  |
| N2               | Cd1  | O1 <sup>4</sup> | 90.19(15)  |
| N2               | Cd1  | O2              | 87.57(17)  |
| N2               | Cd1  | O3              | 95.73(15)  |
| O1 <sup>4</sup>  | Cd1  | O1              | 74.25(12)  |
| O1 <sup>4</sup>  | Cd1  | O3              | 145.01(11) |
| O1               | Cd1  | O3              | 140.43(11) |
| O2               | Cd1  | O1              | 54.22(11)  |
| O2               | Cd1  | O1 <sup>4</sup> | 128.46(11) |
| O2               | Cd1  | O3              | 86.32(11)  |
| O4               | Cd1  | N2              | 87.40(17)  |
| O4               | Cd1  | O1 <sup>4</sup> | 91.33(12)  |
| O4               | Cd1  | O1              | 164.25(12) |
| O4               | Cd1  | O2              | 139.89(12) |
| O4               | Cd1  | O3              | 54.70(12)  |
| Cd1 <sup>4</sup> | O1   | Cd1             | 105.46(12) |

<sup>1</sup>2-X,+Y,3/2-Z; <sup>2</sup>-X,+Y,1/2-Z; <sup>3</sup>+X,1+Y,+Z; <sup>4</sup>1-X,+Y,1/2-Z; <sup>5</sup>+X,-1+Y,+Z

## v. The thermal stability test of 1

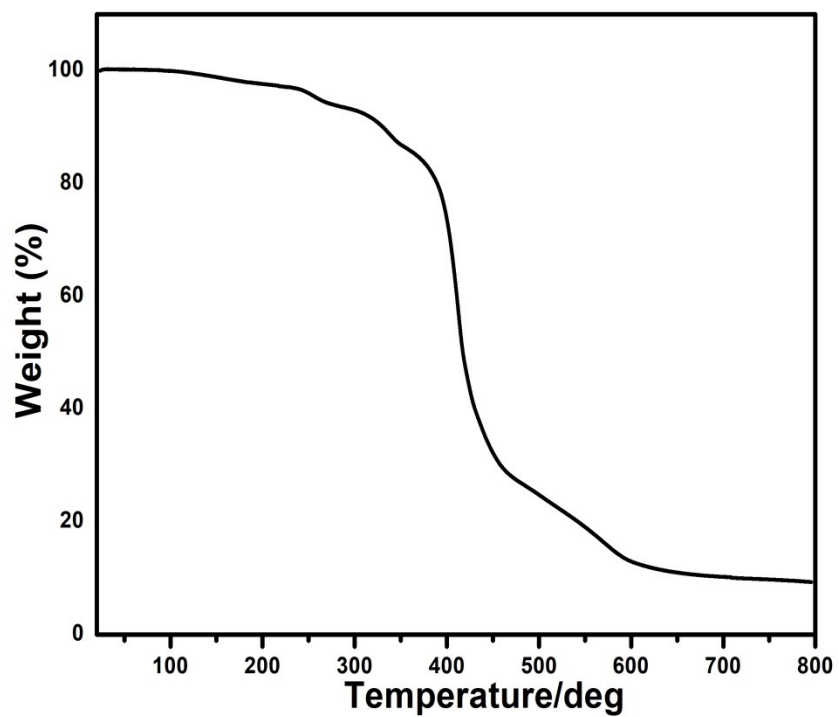

Fig. S1 Thermal stability test (TGA) of 1

## vi. SEM and Mapping

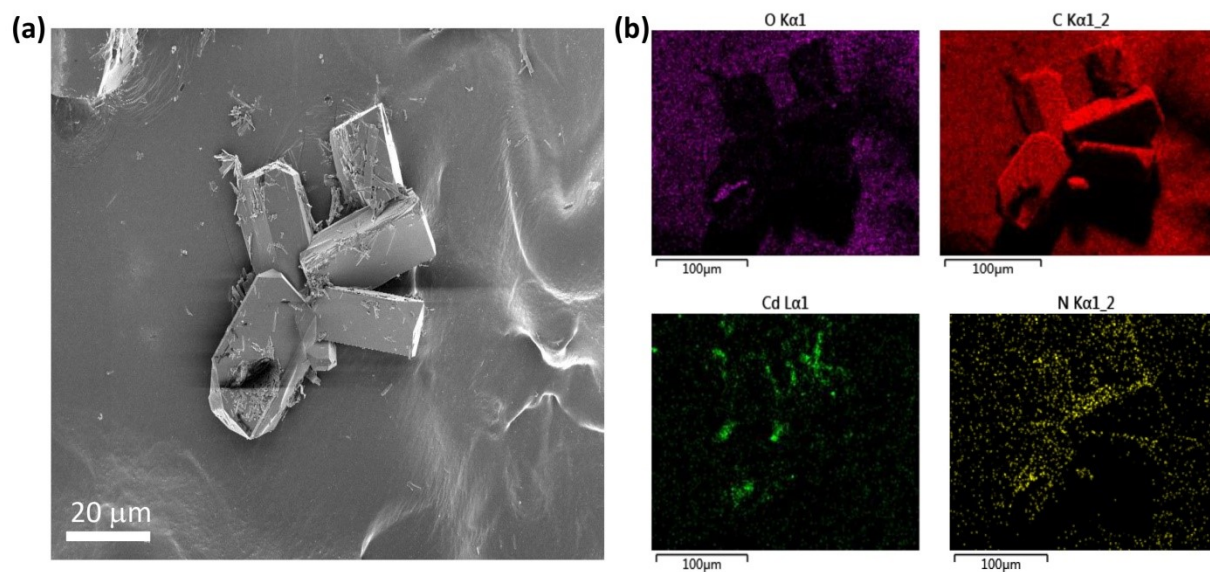

Fig. S2 (a) SEM image of 1 (b) Elemental mapping images of 1.

**vii. Quenching and LoD calculations for antibiotics**

**Standard Deviation ( $\sigma$ ) calculation:**

| <b>Blank Readings</b>                           | <b>FL Intensity</b> |
|-------------------------------------------------|---------------------|
| <b>Reading 1</b>                                | <b>2.53358</b>      |
| <b>Reading 2</b>                                | <b>2.53358</b>      |
| <b>Reading 3</b>                                | <b>2.47324</b>      |
| <b>Reading 4</b>                                | <b>2.35596</b>      |
| <b>Reading 5</b>                                | <b>2.29437</b>      |
| <b>Standard Deviation (<math>\sigma</math>)</b> | <b>0.108251</b>     |

(i)

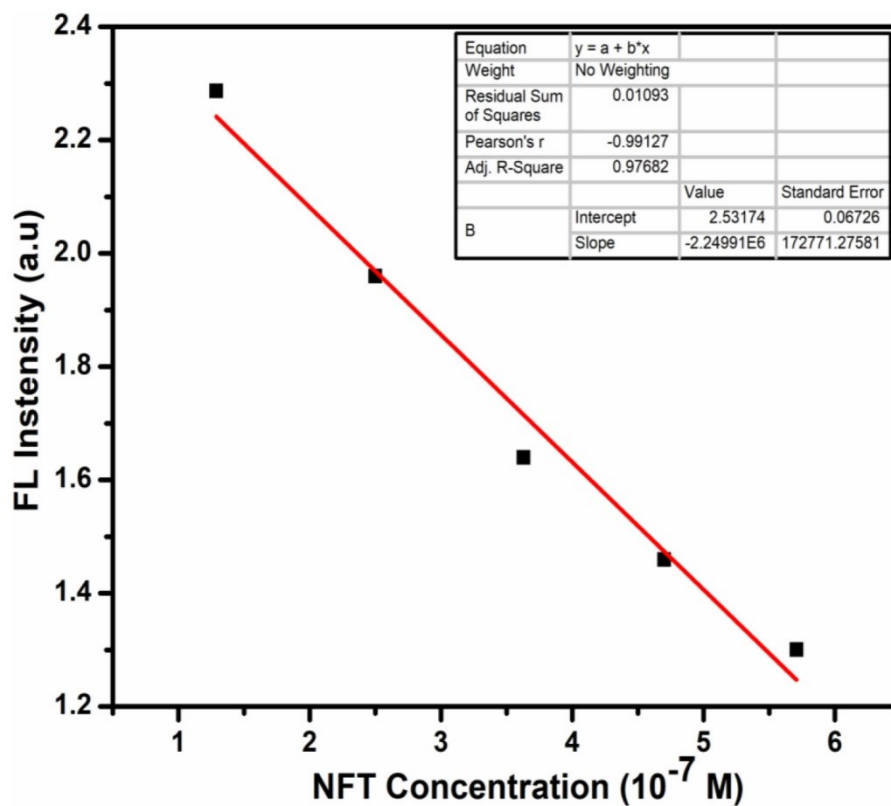

**Fig. S3** LoD calculation for NFT antibiotic

Calculation of Detection limit (LOD) for NFT:

|                                    |              |
|------------------------------------|--------------|
| Slope (m)                          | 2.24991E+6   |
| Standard deviation ( $\sigma$ )    | 0.108251     |
| Limit of detection ( $3\sigma/m$ ) | 0.14 $\mu$ M |



(ii)

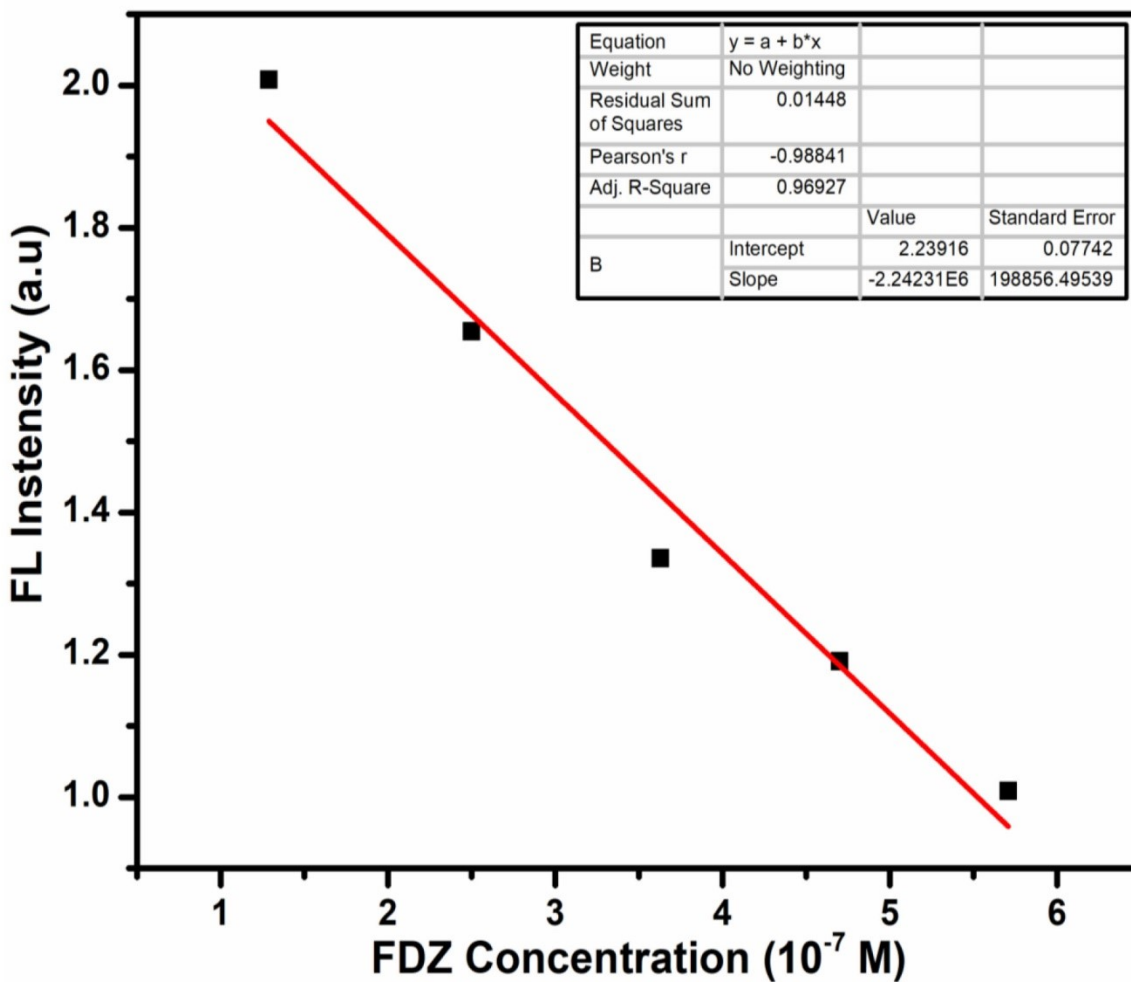

Fig. S4 LoD calculation for FDZ antibiotic

Calculation of Detection limit (LOD) for FDZ:

|                                    |              |
|------------------------------------|--------------|
| Slope (m)                          | 2.24231E+6   |
| Standard deviation ( $\sigma$ )    | 0.108251     |
| Limit of detection ( $3\sigma/m$ ) | 0.14 $\mu$ M |

(iii)

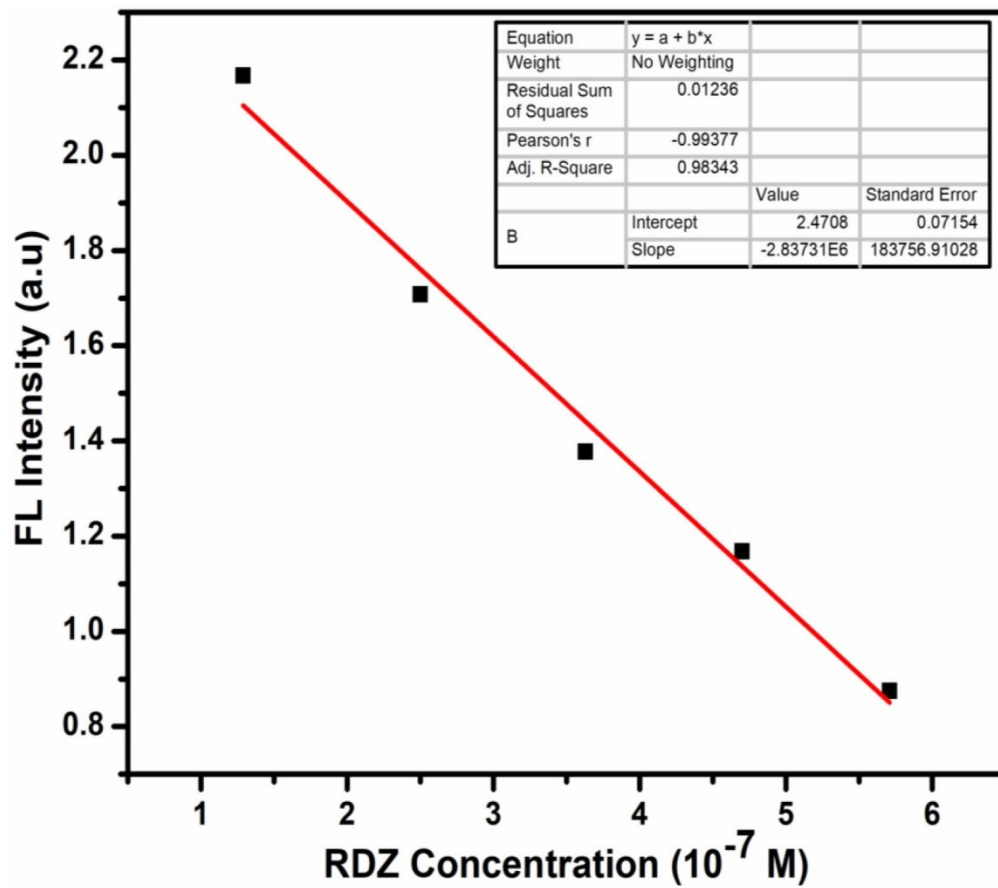

Fig. S5 LoD calculation for RDZ antibiotic

Calculation of Detection limit (LOD) for RDZ:

|                                    |              |
|------------------------------------|--------------|
| Slope (m)                          | 2.83731E+6   |
| Standard deviation ( $\sigma$ )    | 0.108251     |
| Limit of detection ( $3\sigma/m$ ) | 0.11 $\mu$ M |

(iv)

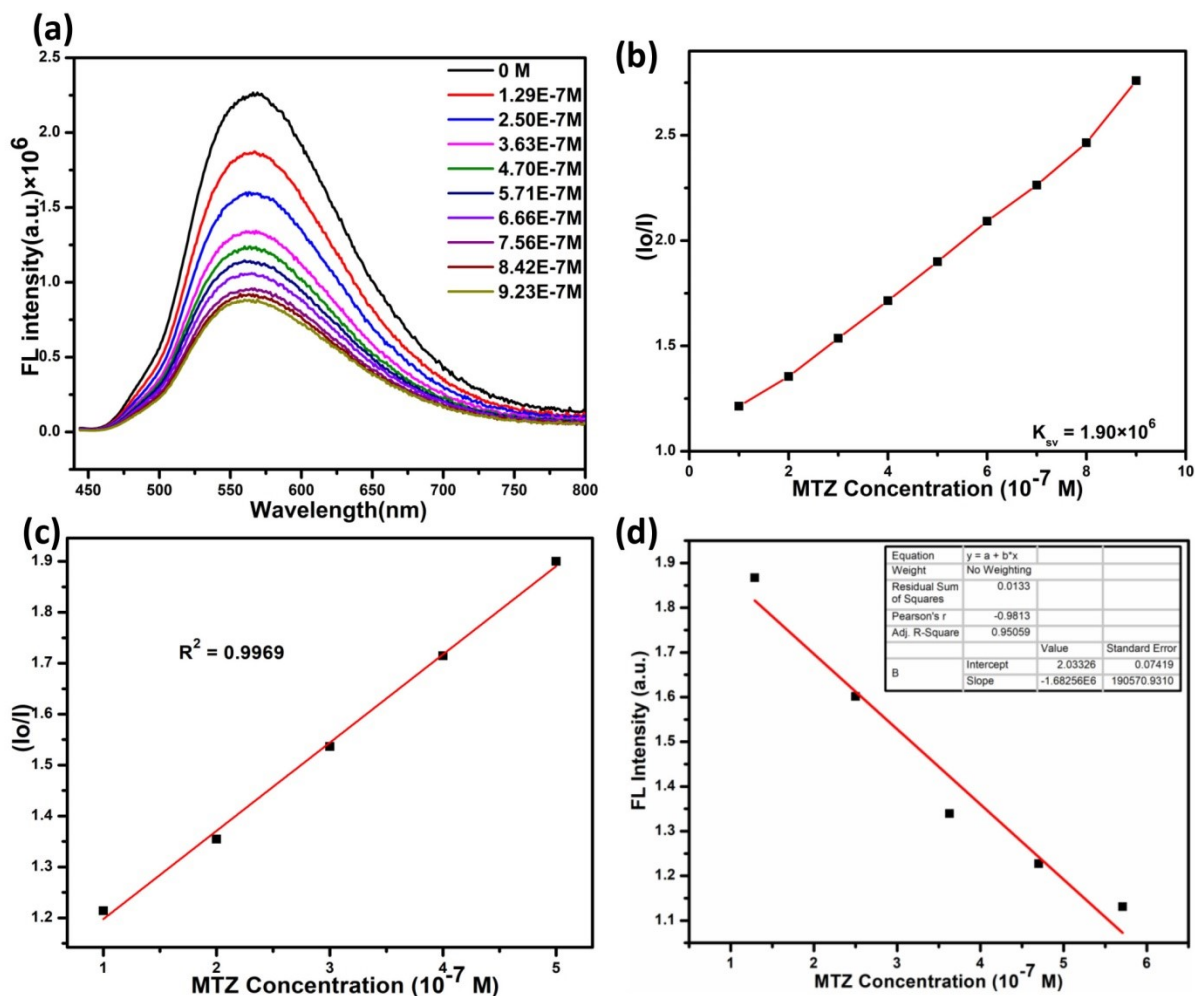

Fig. S6 Quenching titration graph and LoD calculation for MTZ antibiotic

Calculation of Detection limit (LOD) for MTZ:

|                                    |              |
|------------------------------------|--------------|
| Slope (m)                          | 1.68256E+6   |
| Standard deviation ( $\sigma$ )    | 0.108251     |
| Limit of detection ( $3\sigma/m$ ) | 0.19 $\mu$ M |

(V)

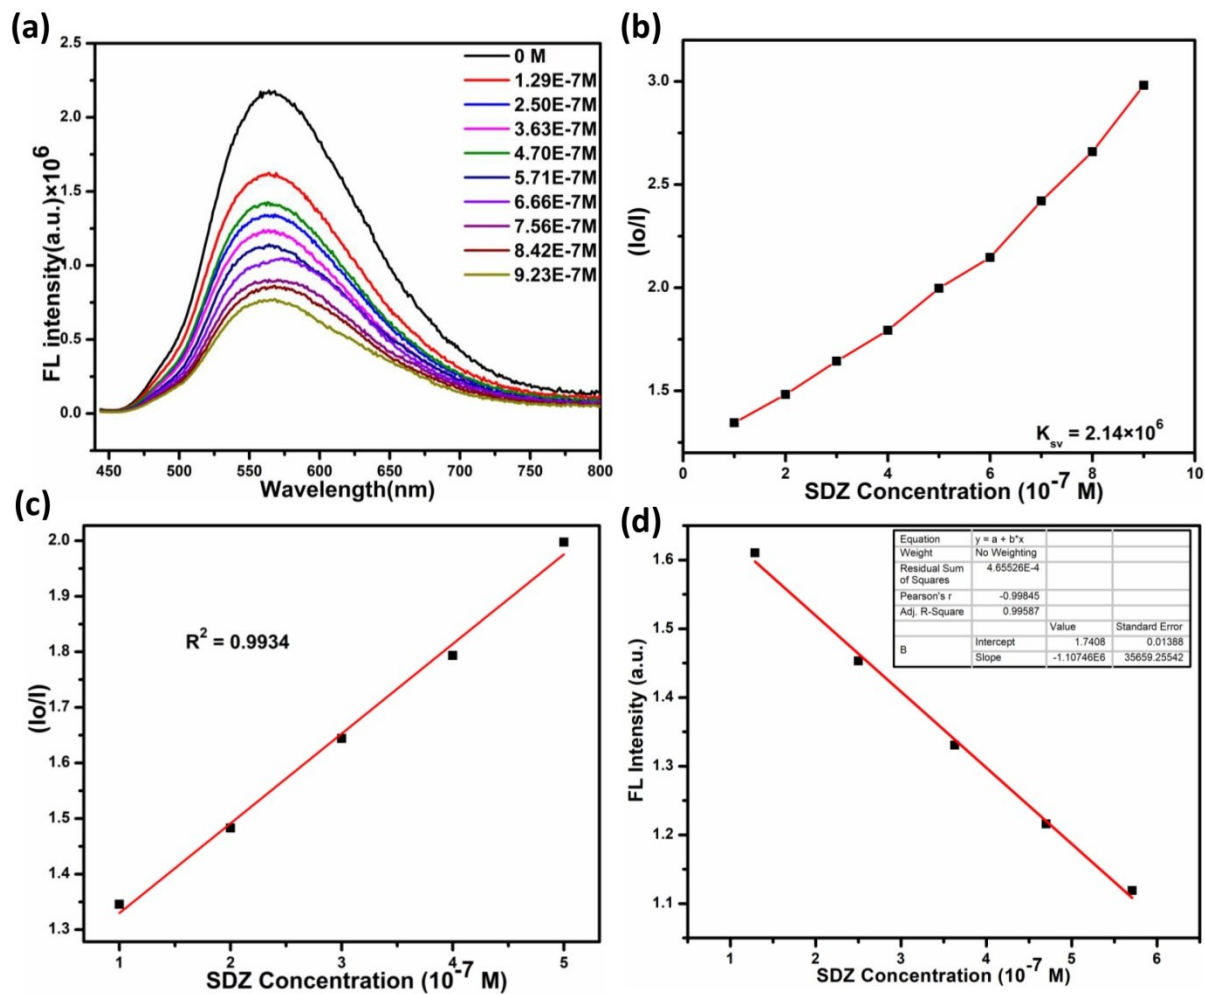

**Fig. S7** Quenching titration graph and LoD calculation for SDZ antibiotic

**Calculation of Detection limit (LOD) for SDZ:**

|                                    |              |
|------------------------------------|--------------|
| Slope (m)                          | 1.10746E+6   |
| Standard deviation ( $\sigma$ )    | 0.108251     |
| Limit of detection ( $3\sigma/m$ ) | 0.29 $\mu$ M |

(vi)

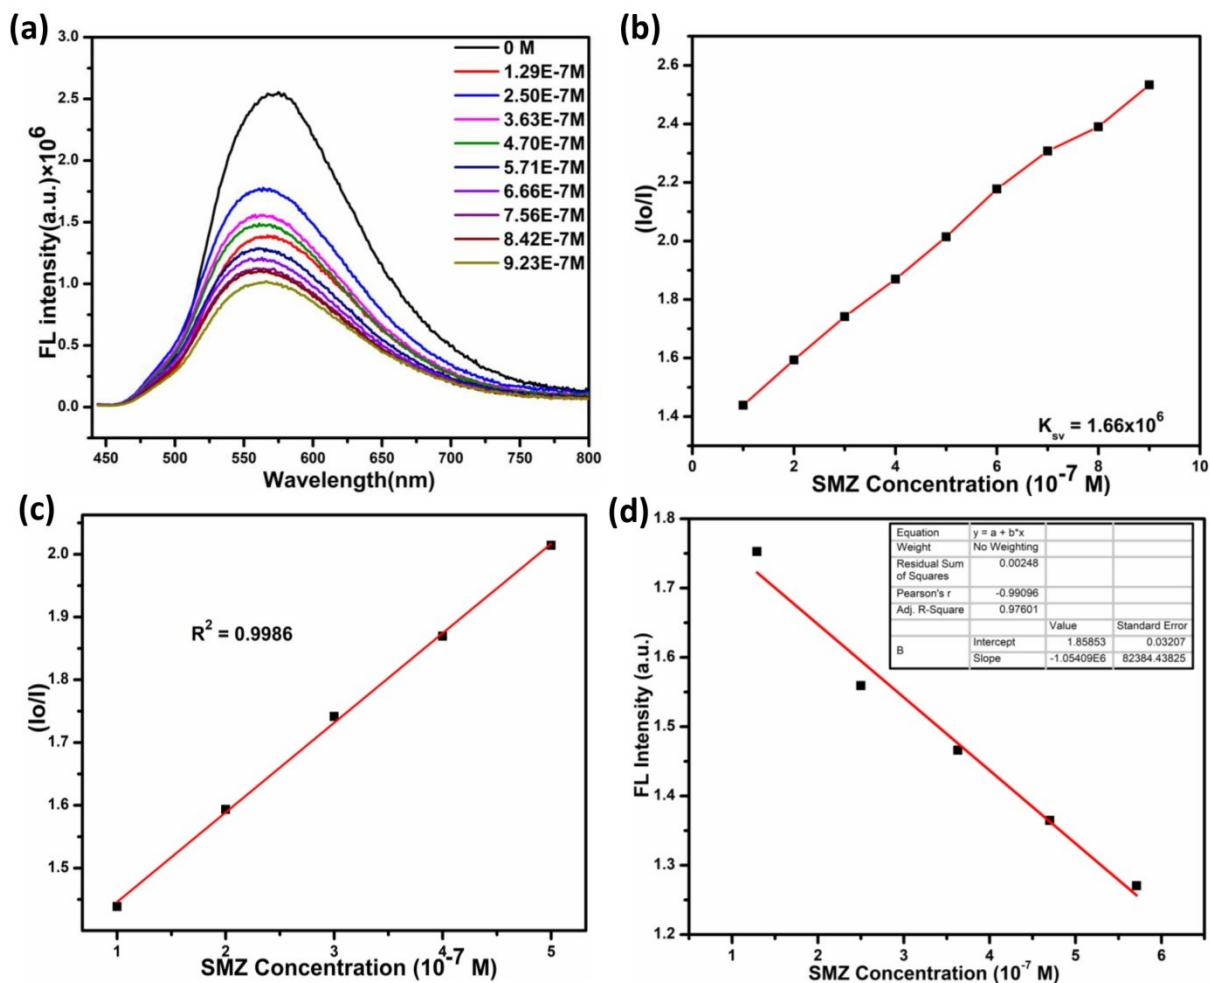

**Fig. S8** Quenching titration graph and LoD calculation for SMZ antibiotic

**Calculation of Detection limit (LOD) for SMZ:**

|                                    |              |
|------------------------------------|--------------|
| Slope (m)                          | 1.05409E+6   |
| Standard deviation ( $\sigma$ )    | 0.108251     |
| Limit of detection ( $3\sigma/m$ ) | 0.30 $\mu$ M |

(vii)

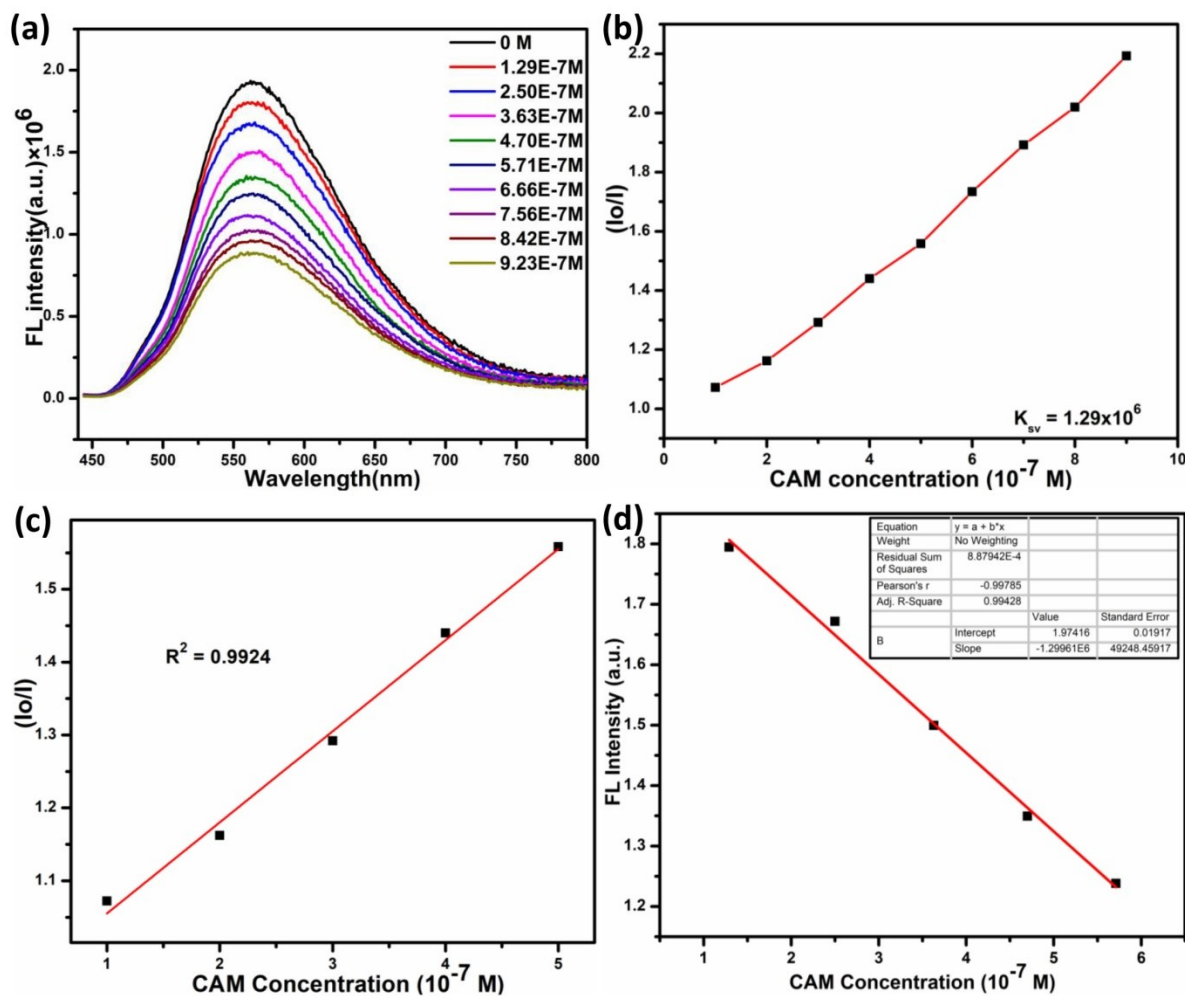

Fig. S9 Quenching titration graph and LOD calculation for CAM antibiotic

Calculation of Detection limit (LOD) for CAM:

|                                    |              |
|------------------------------------|--------------|
| Slope (m)                          | 1.29961E+6   |
| Standard deviation ( $\sigma$ )    | 0.108251     |
| Limit of detection ( $3\sigma/m$ ) | 0.24 $\mu$ M |

(viii)

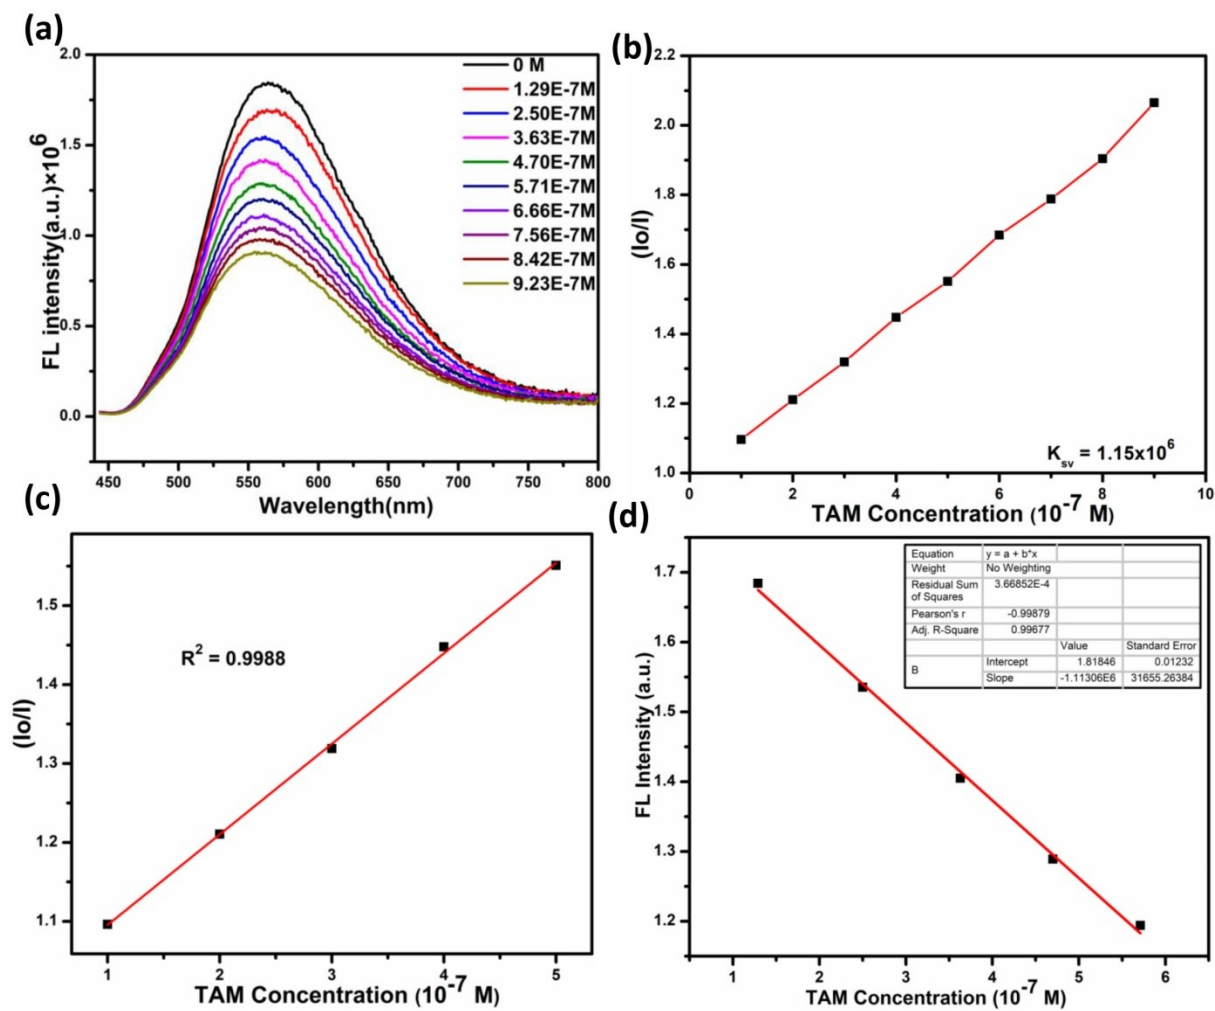

**Fig. S10** Quenching titration graph and LoD calculation for TAM antibiotic

Calculation of Detection limit (LOD) for TAM:

|                                    |              |
|------------------------------------|--------------|
| Slope (m)                          | 1.11306E+6   |
| Standard deviation ( $\sigma$ )    | 0.108251     |
| Limit of detection ( $3\sigma/m$ ) | 0.29 $\mu$ M |

viii. Table. S4 Calculated  $K_{sv}$ ,  $K_q$  and LoD values for common antibiotics

| Selected analytes    | $K_{sv}$ ( $M^{-1}$ ) | $K_q$ ( $M^{-1}S^{-1}$ ) | Detection limits ( $\mu M$ ) |
|----------------------|-----------------------|--------------------------|------------------------------|
| Nitrofuratoin(NFT)   | $2.92 \times 10^6$    | $0.19 \times 10^{15}$    | 0.14                         |
| Furazolidone (FDZ)   | $3.57 \times 10^6$    | $0.23 \times 10^{15}$    | 0.14                         |
| Ronidazole (RDZ)     | $5.16 \times 10^6$    | $0.33 \times 10^{15}$    | 0.11                         |
| Metronidazole (MTZ)  | $1.91 \times 10^6$    | $0.12 \times 10^{15}$    | 0.19                         |
| Sulfadiazine (SDZ)   | $2.14 \times 10^6$    | $0.14 \times 10^{15}$    | 0.29                         |
| Sulfamethazine (SMZ) | $1.66 \times 10^6$    | $0.10 \times 10^{15}$    | 0.30                         |
| Chloramphenicol(CAM) | $1.29 \times 10^6$    | $0.84 \times 10^{14}$    | 0.24                         |
| Thiamphenicol (TAM)  | $1.15 \times 10^6$    | $0.75 \times 10^{14}$    | 0.29                         |

ix. Recyclability study

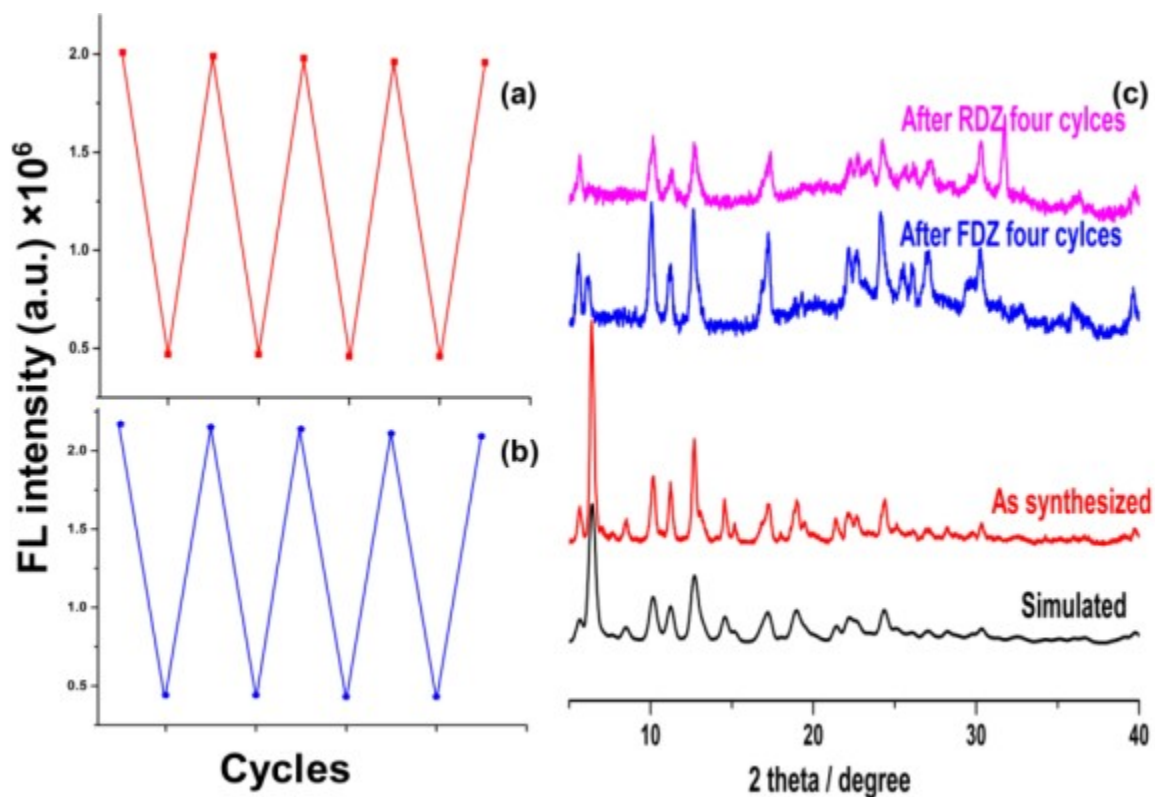

**Fig. S11** Fluorescence intensity of **1** after four cycles detection of (a) FDZ, (b) RDZ and (c) P-XRD patterns of **1** after 4 cycles sensing of FDZ and RDZ compared with the simulated and as-synthesized.



x. Uv-visible spectroscopy

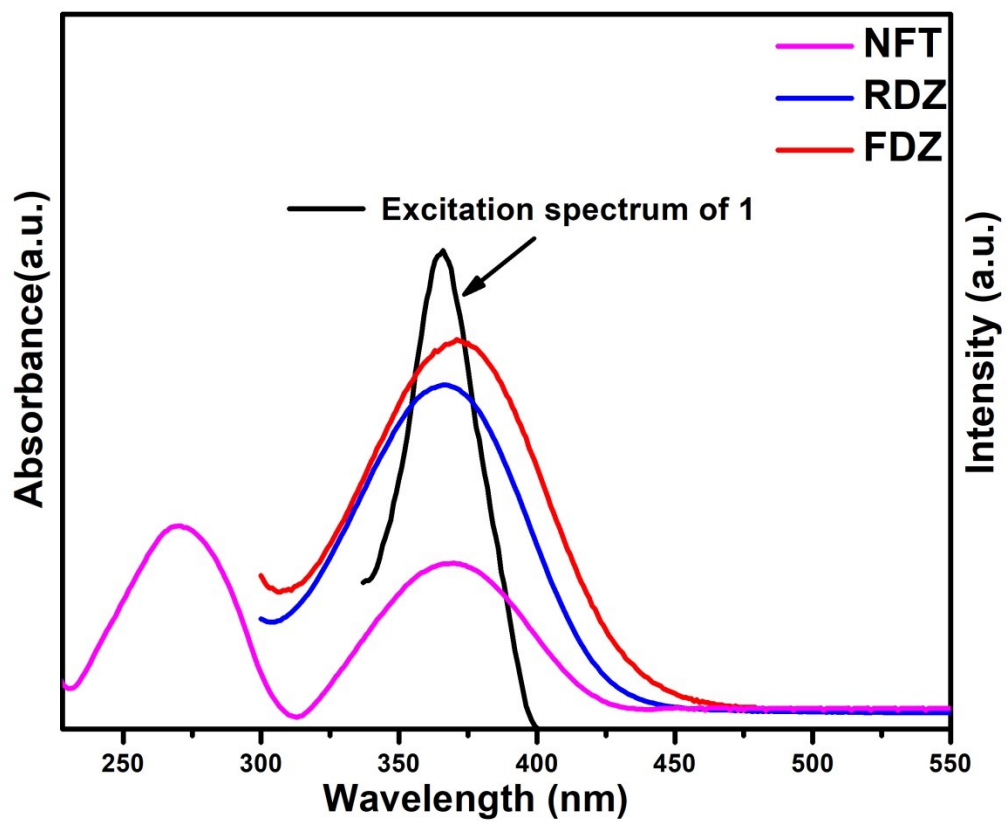

Fig. S12 UV-vis spectra of NFT, RDZ, and FDZ, and excitation spectra of 1

xi. TCSPC calculation for **1** and different antibiotics

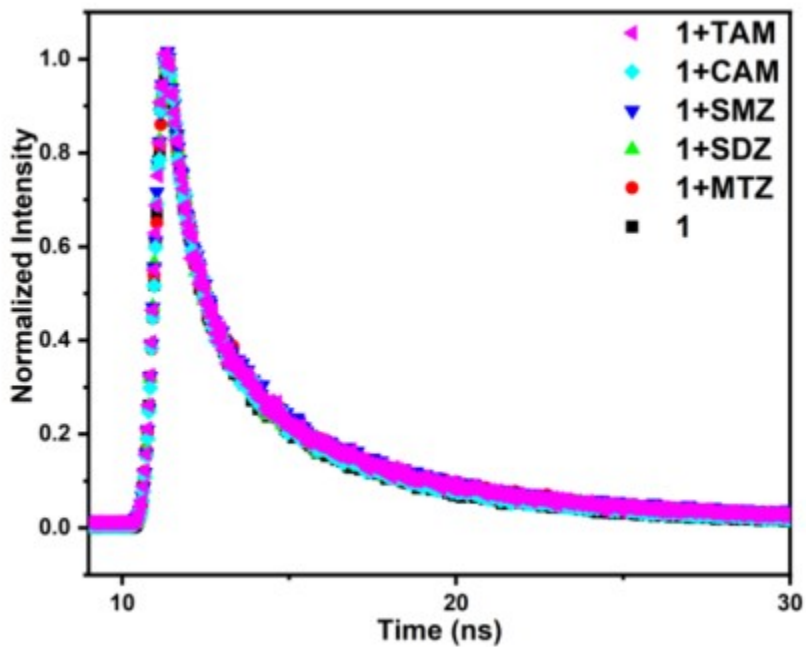

**Fig. S13** Time-resolved fluorescence decay profile for **1** and different antibiotics.

**Table. S5** Decay life-time calculations for **1** and antibiotics

| Samples       | T1 (ns)  | T2 (ns)  | B1     | B2     | (T1×B1+T2×B2) (ns) |
|---------------|----------|----------|--------|--------|--------------------|
| <b>1</b>      | 19.5985  | 5.586098 | 0.6877 | 0.3123 | 15.22              |
| <b>1+NFT</b>  | 7.10502  | 20.48647 | 0.3125 | 0.6875 | 16.30              |
| <b>1+FDZ</b>  | 6.43309  | 19.7718  | 0.2546 | 0.7454 | 16.37              |
| <b>1+RDZ</b>  | 21.53541 | 8.148406 | 0.6784 | 32.16  | 17.23              |
| <b>1+ MTZ</b> | 7.18421  | 20.3890  | 30.45  | 69.55  | 16.36              |
| <b>1+SDZ</b>  | 6.30467  | 19.6943  | 0.2793 | 0.7207 | 15.95              |
| <b>1+SMZ</b>  | 19.82028 | 6.30224  | 0.7100 | 0.2900 | 15.90              |
| <b>1+CAM</b>  | 6.25478  | 20.07246 | 0.3073 | 0.6927 | 15.82              |
| <b>1+TAM</b>  | 5.81566  | 19.47863 | 0.3038 | 0.6962 | 15.32              |

## xii. DFT calculations

All the DFT calculations were performed to find HOMO-LUMO bandgap for **1** and different antibiotics. All theoretical calculations were carried out using Gaussian 09w package with B3LYP function and 6-31+G\* basis set <sup>4-6</sup>.

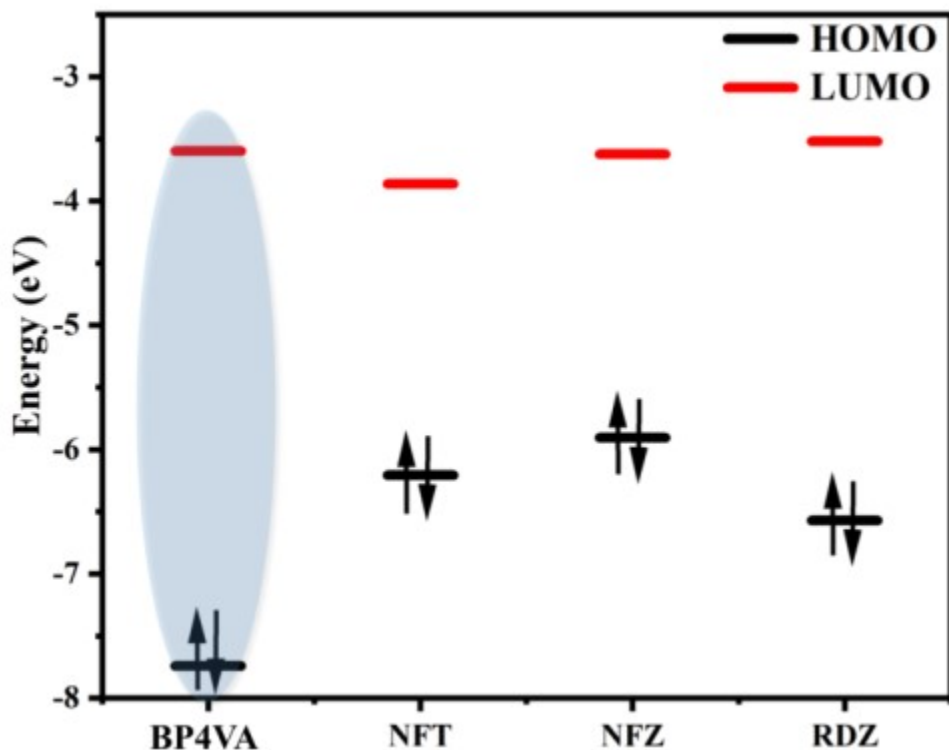

**Fig. S14** Theoretically calculated HOMO and LUMO energies for ligand and different antibiotics.

**Table. S6** Theoretically calculated HOMO-LUMO energy levels for different antibiotics

| Analytes                       | HOMO (eV) | LUMO (eV) | Band gap |
|--------------------------------|-----------|-----------|----------|
| BP <sub>4</sub> V <sub>4</sub> | -7.7419   | -3.599    | -4.1429  |
| NFT                            | -6.205    | -3.864    | -2.341   |
| NFZ                            | -5.905    | -3.624    | -2.281   |
| RDZ                            | -6.57     | -3.52     | -3.05    |
| SDZ                            | -7.564    | 0.0163    | -7.547   |
| MTZ                            | -6.42     | -3.43     | -2.99    |
| SMZ                            | -5.457    | -1.898    | -3.559   |
| CAM                            | -6.58     | -3.69     | -2.89    |
| TAM                            | -7.09     | -1.52     | -5.57    |

### xiii. References

1. G. M. Sheldrick, A short history of SHELX. *Acta Crystallogr., Sect. A: Found. Crystallogr.* **2008**, *64* (1), 112-122.
2. O. V. Dolomanov, L. J. Bourhis, R. J. Gildea, J. A. Howard, H. Puschmann, OLEX2: a complete structure solution, refinement and analysis program. *J. Appl. Crystallogr.* **2009**, *42* (2), 339-341.
3. G. M. Sheldrick, Crystal structure refinement with SHELXL. *Acta Crystallogr. C Struct. Chem.* **2015**, *71* (1), 3-8.
4. C. Lee, W. Yang, R. G. Parr, Development of the Colle-Salvetti correlation-energy formula into a functional of the electron density. *J. Physical rev.* **1988**, *37* (2), 785.
5. B. Miehlich, A. Savin, H. Stoll, H. Preuss, Results obtained with the correlation energy density functionals of Becke and Lee, Yang and Parr. *Chem. Phys. Lett* **1989**, *157* (3), 200-206.
6. M. Frisch, G. Trucks, H. Schlegel, G. Scuseria, M. Robb, J. Cheeseman, G. Scalmani, V. Barone, B. Mennucci, G. Petersson, Gaussian 09; Gaussian, Inc. Inc." Wallingford, CT. **2009**, *32*, 5648-5652.
